# Supplementary material
Source: Springer Nature journal article supplement (https://www.springermedizin.de/resource/supplementary/12955_2006_313_MOESM1_ESM.pdf/9560134)
Supplement: MOESM1 [file 9560134]

## i. Identify Concepts and Develop Conceptual Framework

Identify concepts and domains that are important to patients.  
Determine intended population and research application.  
Hypothesize expected relationships among concepts.

## iv. Modify Instrument

Change concepts measured, populations studied, research application, instrumentation, or method of administration.

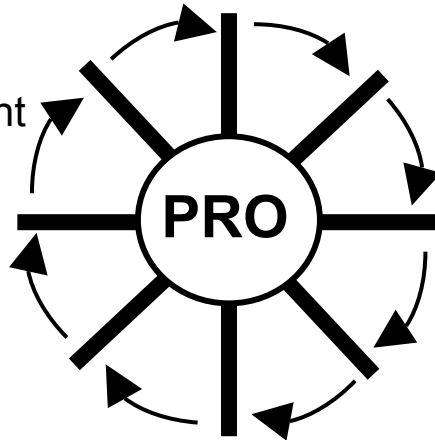

## ii. Create Instrument

Generate items.  
Choose administration method, recall period, and response scales.  
Draft instructions.  
Format instrument.  
Draft procedures for scoring and administration. Pilot test draft instrument. Refine instrument and procedures.

## iii. Assess Measurement Properties

Assess score reliability, validity, and ability to detect change.  
Evaluate administrative and respondent burden. Add, delete, or revise items.  
Identify meaningful differences in scores. Finalize instrument formats, scoring, procedures, and training materials.
